# Supplementary material for: Syntheses, structures, and photoluminescence of lanthanide coordination polymers with pyridine-2,3,5,6-tetracarboxylic acid
Source: Royal Society of Chemistry journal article supplement (doi:10.1039/c0ce00397b), 2010-12-13
Supplement: c0ce00397b.pdf [file c0ce00397b.pdf]

SUPPORTING INFORMATION

**Syntheses, Structures, and Photoluminescence of Lanthanide Coordination  
Polymers with Pyridine-2,3,5,6-tetracarboxylic Acid**

Ai-Hong Yang<sup>1</sup>, Hong-Ling Gao<sup>1</sup>, Jian-Zhong Cui<sup>1\*</sup>, Bin Zhao<sup>a\*</sup>

<sup>1</sup> Department of Chemistry, Tianjin University, Tianjin 300072, P. R. China

<sup>a</sup> Department of Chemistry, Nankai University, Tianjin 300071, P. R. China

\*Author to whom correspondance should be addressed. Email: [cuijianzhong@tju.edu.cn](mailto:cuijianzhong@tju.edu.cn)

S1. The V-shaped (H<sub>2</sub>O)<sub>3</sub> clusters inserted in complex **2**

S2. The acyclic (H<sub>2</sub>O)<sub>4</sub> cluster in **4**

S3. The 2D structures in *ab* plane (a, b) when K ions are shown or not

S4. The network diagram of water tapes with the Sm complex acting as connector in **6**, the pdtc<sup>4-</sup> ligands are simplified for clarity

S5. TGA curves for **2**, **4** and **6**

---

\* Corresponding author. *E-mail*: [cuijianzhong@tju.edu.cn](mailto:cuijianzhong@tju.edu.cn) (J.-Z. Cui).

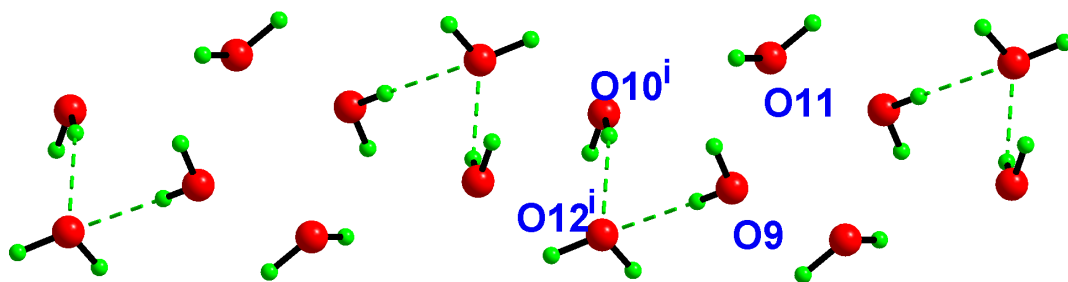

S1. The V-shaped (H<sub>2</sub>O)<sub>3</sub> clusters inserted in complex **2**. The symmetry code: <sup>i</sup> 1-x, 1-y, -z.

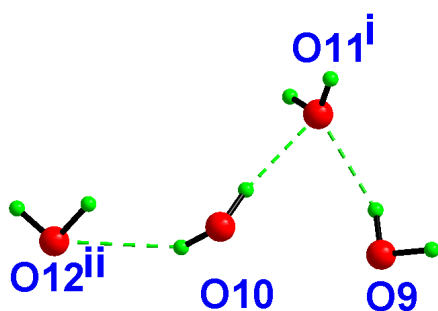

S2. The acyclic (H<sub>2</sub>O)<sub>4</sub> cluster in **4**. The symmetry code: <sup>i</sup> -x, 1-y, 1-z; <sup>ii</sup> x, -1+y, 1+z.

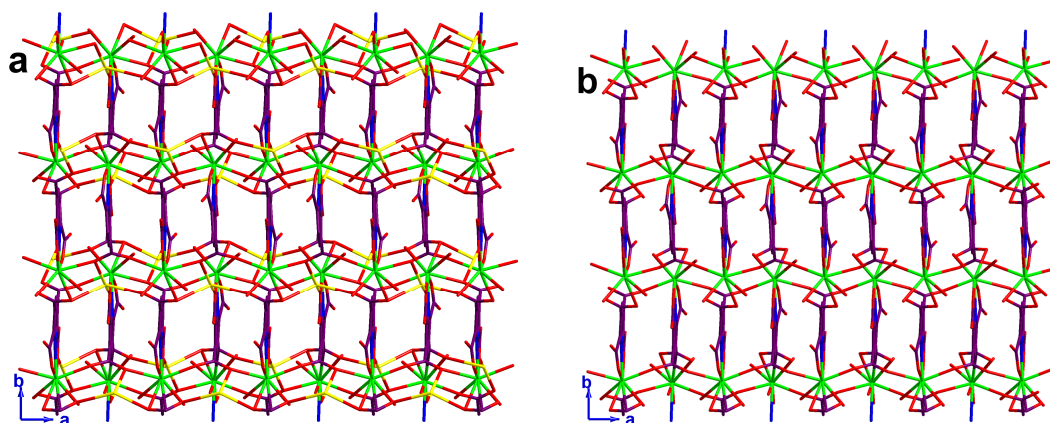

S3. The 2D structures in *ab* plane (a, b) when K ions are shown or not

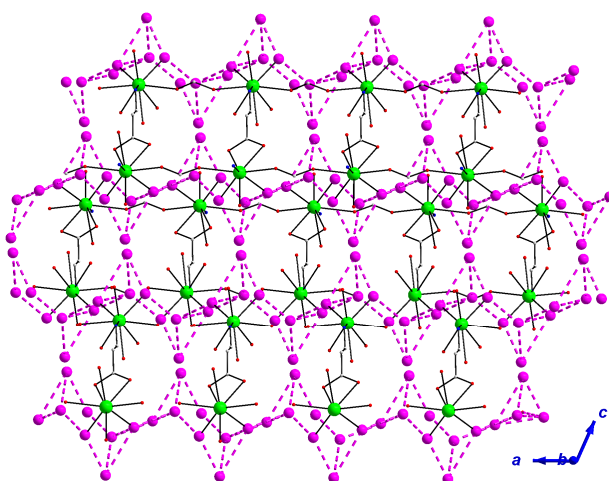

S4. The network diagram of water tapes with the Sm complex acting as connector in **6**, the pdtc<sup>4-</sup>

ligands are simplified for clarity

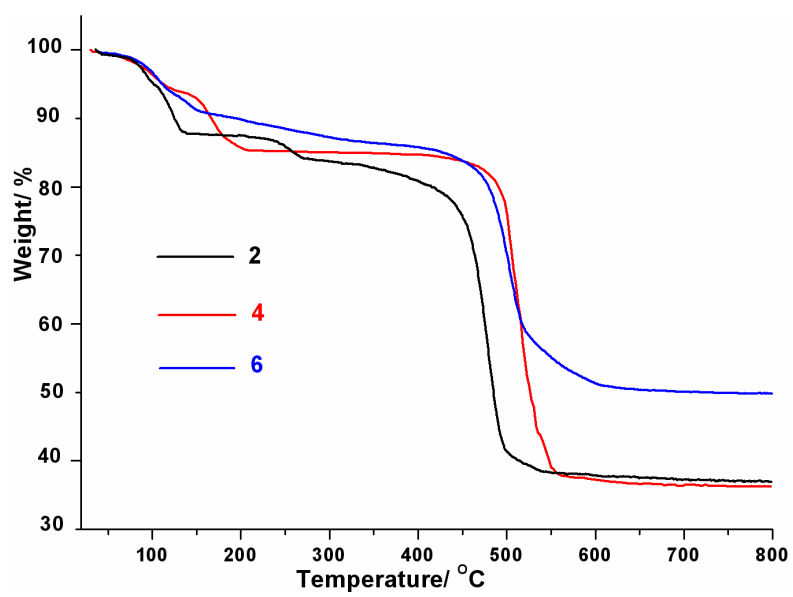

S5. TGA curves for 2, 4 and 6
